# Supplementary material
Source: PubMed Central journal article supplement (PMC10193860)
Supplement: JHM-16-397-s001.pdf [file JHM-16-397-s001.pdf]

**Appendix Table 1.** Participant medical comorbidities and severity of illness.

|                                                           | Epoch 0<br>-12 to 0 months<br>n = 11018 | Epoch 1<br>0 to 3 months<br>n = 2935 | Epoch 2<br>3 to 6 months<br>n = 2861 | Epoch 3<br>6 to 9 months<br>n = 2947 | Epoch 4<br>9 to 12 months<br>n = 2947 |
|-----------------------------------------------------------|-----------------------------------------|--------------------------------------|--------------------------------------|--------------------------------------|---------------------------------------|
| <b>Elixhauser Comorbidities</b>                           |                                         |                                      |                                      |                                      |                                       |
| Congestive heart failure                                  | 935 (8.5%)                              | 247 (8.7%)                           | 241 (8.2%)                           | 278 (9.4%)                           | 277 (9.4%)                            |
| Valvular disease                                          | 440 (4.0%)                              | 114 (4.0%)                           | 111 (3.8%)                           | 131 (4.5%)                           | 107 (3.6%)                            |
| Pulmonary circulation disease                             | 136 (1.2%)                              | 45 (1.6%)                            | 43 (1.5%)                            | 51 (1.7%)                            | 47 (1.6%)                             |
| Peripheral vascular disease                               | 572 (5.2%)                              | 133 (4.7%)                           | 156 (5.3)                            | 123 (4.2%)                           | 132 (4.5%)                            |
| Hypertension                                              | 6257 (56.8%)                            | 1564 (54.9%)                         | 1567 (53.2%)                         | 1526 (51.8%)                         | 1586 (53.8%)                          |
| Paralysis                                                 | 381 (3.5%)                              | 104 (3.7%)                           | 88 (3.0%)                            | 107 (3.6%)                           | 124 (4.2%)                            |
| Other neurological disease                                | 770 (7.0%)                              | 214 (7.5%)                           | 210 (7.1%)                           | 202 (6.9%)                           | 215 (7.3%)                            |
| Chronic pulmonary disease                                 | 1978 (18.0%)                            | 533 (18.7%)                          | 550 (18.7%)                          | 572 (19.4%)                          | 555 (18.8%)                           |
| Diabetes                                                  | 1511 (13.7%)                            | 335 (11.8%)                          | 359 (12.2%)                          | 362 (12.3%)                          | 369 (12.5%)                           |
| Diabetes with chronic complications                       | 1404 (12.7%)                            | 453 (15.9%)                          | 395 (13.4%)                          | 437 (14.8%)                          | 448 (15.2%)                           |
| Hypothyroidism                                            | 1508 (13.7%)                            | 366 (12.9%)                          | 378 (12.8%)                          | 362 (12.3%)                          | 372 (12.6%)                           |
| Renal failure                                             | 1870 (17.0%)                            | 499 (17.5%)                          | 450 (15.3%)                          | 500 (17.0%)                          | 451 (15.3%)                           |
| Liver disease                                             | 1067 (9.7%)                             | 279 (9.8%)                           | 266 (9.0%)                           | 278 (9.4%)                           | 256 (8.7%)                            |
| Peptic ulcer disease                                      | 70 (0.6%)                               | 16 (0.6%)                            | 16 (0.5%)                            | 22 (0.8%)                            | 17 (0.6%)                             |
| Acquired immunodeficiency syndrome                        | 94 (0.9%)                               | 28 (1.0%)                            | 19 (0.6%)                            | 27 (0.9%)                            | 16 (0.5%)                             |
| Lymphoma                                                  | 185 (1.7%)                              | 74 (2.6%)                            | 83 (2.8%)                            | 42 (1.4%)                            | 44 (1.5%)                             |
| Metastatic cancer                                         | 679 (6.2%)                              | 198 (7.0%)                           | 171 (5.8%)                           | 195 (6.6%)                           | 207 (7.0%)                            |
| Solid tumor without metastasis                            | 445 (4.0%)                              | 127 (4.5%)                           | 120 (4.1%)                           | 125 (4.2%)                           | 120 (4.1%)                            |
| Rheumatoid arthritis/collagen                             | 409 (3.7%)                              | 109 (3.8%)                           | 114 (3.9%)                           | 105 (3.6%)                           | 101 (3.4%)                            |
| Coagulopathy                                              | 735 (6.7%)                              | 208 (7.3%)                           | 199 (6.8%)                           | 193 (6.6%)                           | 220 (7.5%)                            |
| Obesity                                                   | 953 (8.7%)                              | 224 (7.9%)                           | 258 (8.8%)                           | 256 (8.7%)                           | 279 (9.5%)                            |
| Weight loss                                               | 660 (6.0%)                              | 208 (7.3%)                           | 214 (7.3%)                           | 232 (7.9%)                           | 256 (8.7%)                            |
| Fluid and electrolyte disorders                           | 2844 (25.8%)                            | 704 (24.7%)                          | 729 (24.7%)                          | 743 (25.2%)                          | 684 (23.2%)                           |
| Chronic blood loss anemia                                 | 56 (0.5%)                               | 21 (0.7%)                            | 15 (0.5%)                            | 22 (0.8%)                            | 21 (0.7%)                             |
| Deficiency anemia                                         | 1918 (17.4%)                            | 472 (16.6%)                          | 504 (17.1%)                          | 560 (19.0%)                          | 497 (16.9%)                           |
| Alcohol abuse                                             | 267 (2.4%)                              | 58 (2.0%)                            | 52 (1.8%)                            | 61 (2.1%)                            | 55 (1.9%)                             |
| Drug abuse                                                | 234 (2.1%)                              | 36 (1.3%)                            | 51 (1.7%)                            | 63 (2.1%)                            | 55 (1.9%)                             |
| Psychoses                                                 | 386 (3.5%)                              | 93 (3.3%)                            | 92 (3.1%)                            | 94 (3.2%)                            | 95 (3.2%)                             |
| Depression                                                | 1521 (13.8%)                            | 343 (12.0%)                          | 351 (11.9%)                          | 328 (11.1%)                          | 364 (12.4%)                           |
| <b>Severity of Illness Quartile (Increasing Severity)</b> |                                         |                                      |                                      |                                      |                                       |
| 1                                                         | 1556 (14.1%)                            | 394 (13.8%)                          | 373 (12.7%)                          | 373 (12.7%)                          | 376 (12.8%)                           |
| 2                                                         | 4222 (38.3%)                            | 1051 (36.9%)                         | 1115 (37.8%)                         | 1081 (36.7%)                         | 1109 (37.6%)                          |
| 3                                                         | 4127 (38.3%)                            | 1092 (38.3%)                         | 1131 (38.4%)                         | 1159 (39.3%)                         | 1105 (37.5%)                          |
| 4                                                         | 1113 (10.1%)                            | 312 (11.0%)                          | 328 (11.1%)                          | 334 (11.3%)                          | 357 (12.1%)                           |
