# Supplementary material
Source: PubMed Central journal article supplement (PMC10193860)
Supplement: JHM-16-397-s002.pdf [file JHM-16-397-s002.pdf]

**Appendix Table 2.** Clinical outcomes by epoch for all patients combined and medicine unit patients.

| Clinical Outcome                   | Epoch 0<br>-12 to 0 months | Epoch 1<br>0 to 3 months | Epoch 2<br>3 to 6 months | Epoch 3<br>6 to 9 months | Epoch 4<br>9 to 12 months |
|------------------------------------|----------------------------|--------------------------|--------------------------|--------------------------|---------------------------|
| <b>All Patients</b>                | n = 11018                  | n = 2935                 | n = 2861                 | n = 2947                 | n = 2947                  |
| Length of Stay in Days             |                            |                          |                          |                          |                           |
| Mean (SD)                          | 6.3 (6.8)                  | 6.3 (7.3)                | 6.2 (6.5)                | 6.2 (6.5)                | 6.1 (6.6)                 |
| Median (IQR)                       | 4 (3, 7)                   | 4 (3, 7)                 | 4 (3, 7)                 | 4 (3, 7)                 | 4 (3, 7)                  |
| Total Direct Cost in Dollars       |                            |                          |                          |                          |                           |
| Mean (SD)                          | 24706<br>(33763)           | 24339<br>(33107)         | 23650<br>(32184)         | 23977<br>(33717)         | 23534<br>(37467)          |
| Median (IQR)                       | 14333 (8320,<br>25237)     | 14607 (8482,<br>25663)   | 14074 (8454,<br>25663)   | 13529 (8025,<br>24447)   | 13663 (8027,<br>24401)    |
| 30-Day Hospital Readmission, %     | 17.0%                      | 18.2%                    | 16.7%                    | 16.9%                    | 14.1%                     |
| Restraint Rate <sup>1</sup>        | 16.4                       | 17.1                     | 12.0                     | 13.8                     | 11.0                      |
| Safety Attendant Rate <sup>2</sup> | 45.9                       | 32.7                     | 27.5                     | 20.3                     | 20.7                      |
| <b>Medicine Unit</b>               | n = 2552                   | n = 567                  | n = 508                  | n = 652                  | n = 644                   |
| Length of Stay in Days             | 4 (3, 7)                   | 4 (3, 7)                 | 4 (3, 6)                 | 4 (3, 7)                 | 4 (3, 6)                  |
| Mean (SD)                          | 6.8 (7.8)                  | 7.2 (10.7)               | 5.4 (4.8)                | 5.9 (5.8)                | 5.6 (5.5)                 |
| Median (IQR)                       | 4 (3, 7)                   | 4 (3, 7)                 | 4 (3, 6)                 | 4 (3, 7)                 | 4 (3, 6)                  |
| Total Direct Cost in Dollars       |                            |                          |                          |                          |                           |
| Mean (SD)                          | 17674<br>(22314)           | 18395<br>(25548)         | 13897<br>(22546)         | 14169<br>(16000)         | 12705<br>(12406)          |
| Median (IQR)                       | 10850<br>(6569, 18952)     | 10352<br>(6467, 18798)   | 9362<br>(6299, 15407)    | 9673<br>(6400, 15558)    | 8766<br>(5755, 14602)     |
| 30-Day Hospital Readmission, %     | 22.5%                      | 24.9%                    | 19.7%                    | 20.7%                    | 17.4%                     |
| Restraint Rate <sup>1</sup>        | 21.6                       | 25.8                     | 17.1                     | 27.5                     | 13.1                      |
| Safety Attendant Rate <sup>2</sup> | 67.8                       | 52.6                     | 69.2                     | 54.5                     | 58.4                      |

Abbreviations: IQR: interquartile range; SD: standard deviation.

<sup>1</sup>Restraint days per 1000 patient days.

<sup>2</sup>Safety attendant days per 1000 patient days.
