# Supplementary material
Source: PubMed Central journal article supplement (PMC10193860)
Supplement: JHM-16-397-s004.pdf [file JHM-16-397-s004.pdf]

**Appendix Table 3.** Interaction analysis for length of stay, 30-day readmission and safety attendant use.

| Hospital Unit           | Length of Stay          |         | 30-Day Readmission      |         | Safety Attendant          |         |
|-------------------------|-------------------------|---------|-------------------------|---------|---------------------------|---------|
|                         | Adjusted OR<br>(95% CI) | P value | Adjusted OR<br>(95% CI) | P value | Adjusted OR<br>(95% CI)   | P value |
| Neurosciences           | 1.03 (0.99, 1.07)       | 0.1368  | 0.80 (0.62, 1.05)       | 0.1051  | 0.98 (0.71, 1.34)         | 0.8846  |
| Medicine                | 0.91 (0.83, 0.99)       | 0.0028  | 0.86 (0.80, 0.93)       | 0.0002  | 0.85 (0.68, 1.07)         | 0.1589  |
| Cardiology              | 1.02 (0.98, 1.07)       | 0.2889  | 1.05 (0.83, 1.33)       | 0.6650  | 0.77 (0.52, 1.15)         | 0.2095  |
| Specialty Surgery       | 0.96 (0.92, 1.00)       | 0.0753  | 1.04 (0.82, 1.31)       | 0.7792  | 0.11 (0.06, 0.22)         | <0.0001 |
| General Surgery         | 1.00 (0.98, 1.03)       | 0.8125  | 0.87 (0.72, 1.05)       | 0.1510  | 0.24 (0.17, 0.35)         | <0.0001 |
| Hematology-<br>Oncology | 0.92 (0.85, 0.98)       | 0.0161  | 0.83 (0.67, 1.02)       | 0.0800  | 0.16 (0.1, 0.26)          | <0.0001 |
| Transplant              | 0.98 (0.94, 1.02)       | 0.3474  | 0.68 (0.55, 1.17)       | 0.0007  | 0.004<br>(0.0013, 0.0182) | <0.0001 |

Abbreviations: CI: confidence interval; OR: odds ratio.
