# Supplementary material
Source: PubMed Central journal article supplement (PMC10193860)
Supplement: JHM-16-397-s005.pdf [file JHM-16-397-s005.pdf]

AM

## PROMOTE WAKEFULNESS

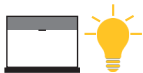

Shades up. Lights on.

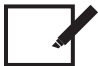

Write date and staff names on board to orient patient.

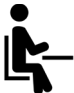

Patient out of bed to chair for all 3 meals. Ask for assistance if you need help.

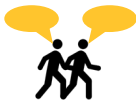

Walk patient 3x/day. Engage patient in conversation.

Hi, my name is...

Each visit introduce yourself, remind patient where they are, what day and time it is.

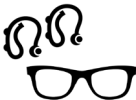

Patient is wearing hearing aids/glasses (if needed) to hear and see appropriately.

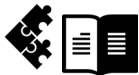

Provide activities like games and reading materials to keep patient's mind active while awake.

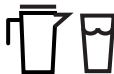

Make sure your patient has water within reach at all times. Dehydration is the #1 complaint in the hospital!

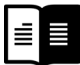

Make sure family members have been provided the pamphlet about delirium and discuss any questions they have. It is ok to refer to the nurse or doctor if you are unsure.

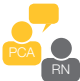

Discuss with the nurse at each shift if the patient truly needs the following: nasal cannula on their nose, foley catheter, telemetry, and CPO. These "tethers" make it difficult for the patient to move and can contribute to confusion.
